# Supplementary material for: Saffold Virus, a Human Theiler's-Like Cardiovirus, Is Ubiquitous and Causes Infection Early in Life
Source: PubMed Central journal article supplement (PMC2670511; doi:10.1371/journal.ppat.1000416), 2009-05-01
Supplement: ppat.1000416.s001.pdf [file ppat.1000416.s001.pdf]

A

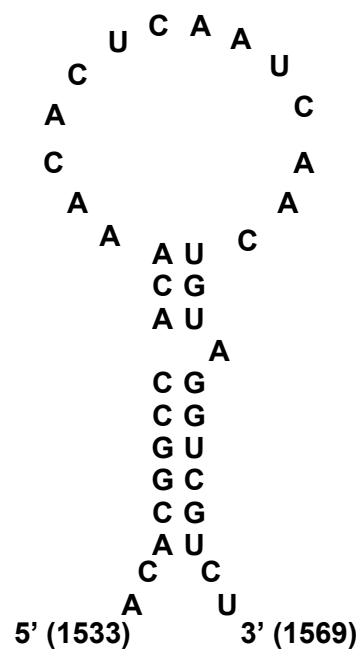

B

|                  |                                       |
|------------------|---------------------------------------|
| SAFV-3 NL2007    | ACACGGCCACAAACACUCAAUCAACUGUAGGUCGUCU |
| SAFV-3 DVI2223   | .....                                 |
| SAFV-3 DVI2273   | .....                                 |
| SAFV-2 UC1       | .....U..A.....C...U.                  |
| SAFV-2 Can112051 | .....U..G.....C...U.                  |
| SAFV-2 BR118     | .....C..A.....C...U.                  |
| SAFV-2 DVI2229   | .U.....C..A.....U.                    |
| SAFV-1           | .....U.....C..A..G.....U.             |
| TMEV GDVII       | .UU.....A..G..U.....U..C..G..         |
| TMEV DA          | .UU.....C.....U.....U.....A..         |
| TRV-1            | .UU.....GU.....GU.A.....C..A..        |
| TRV NGS910       | .UU.....GU.....C.....U.A.....C..A..   |
| VHEV             | .UU.....CU.C..U..C..G..               |
| EMCV             | .....U.....C.....C..U.....            |

stem

stem
