# Supplementary material for: Saffold Virus, a Human Theiler's-Like Cardiovirus, Is Ubiquitous and Causes Infection Early in Life
Source: PubMed Central journal article supplement (PMC2670511; doi:10.1371/journal.ppat.1000416), 2009-05-01
Supplement: ppat.1000416.s002.pdf [file ppat.1000416.s002.pdf]

A

|                  |                                                                                     |
|------------------|-------------------------------------------------------------------------------------|
| SAFV-3 NL2007    | -MA-----CKHGY-LLCPLCTALDITPDGSFTLLFDNEWYPTDLLTVNLDDDDVFYPLDT-----NMDWTDLPLIQDIVMEPQ |
| SAFV-2 UC1       | -MA-----CKHGY-LMCPLCTALDKTSDGLFTLLFDNEWYPTDLLTVNLEDEVFYPPDP-----HMEWTDLPLIQDIEMEPQ  |
| SAFV-2 Can112051 | -MA-----CKHGY-LMCPLCTALDNTSDGLFTLLFDNEWYPTDLLTVNLEDEVFYPPDL-----HMEWTDLPLNQDIEMEPQ  |
| SAFV-1           | -MA-----CKHGY-FLCPLCTAIDISADGSFALLFDNEWYPTDLLTVLDLDDVDFHPPDC-----VMEWTDLPLIQDIVMEPQ |
| TMEV GDVII       | -MA-----CKHGY-DVCPICTAVDATPDFEYLLMADGEWFPDLLCVDLDDVDFWPSDTSTQPTMEWTDVPLVCDTVMEPQ    |
| TMEV DA          | -MA-----CKHGY-DVCPICTAVDVTPGFEYLLADGEWFPDLLCVDLDDVDFWPSNSSNQSETMEWTDLPLVRDIVMEPQ    |
| TRV1             | MMA-----CIHGY-SVCPICTAIDKSSDGMYYLLADNEWFPADLLTMDLDDVDFWPNDKSNVSETMDWTDLPFILDIVMEPQ  |
| TRV NGS910       | MMA-----CIHGY-SVCPICTAIDKSSDGMYYLLADNEWFPADLLTMDLDDVDFWPNDKSNVSETMDWTDLPFILDIVMEPQ  |
| VHEV             | -MA-----CKHGY-DVCPICTAIDVTPGFEYLLADGEWFPDLLCVDLDDVDFWPSDSSNQSQTMEWTDIPLICDITVMEPQ   |
| EMCV             | -MATTEQEICAHSMTFEPCPKCSALQYR-NGFYLLKYDEEWYPEELLT-DGEDDVDFPDL-----MEVVFETQ           |

zinc finger
acidic domain
S/T-rich domain

B

|                  |                                                                            |
|------------------|----------------------------------------------------------------------------|
| SAFV-3 NL2007    | TDIRFCALSALLWILLQTDHLSLCLIMSGIQPTF*                                        |
| SAFV-2 UC1       | TDIRLCALFALLSTKLRTDFSPFCSTMNGTQLTY*                                        |
| SAFV-2 Can112051 | TDIRLCALFALLSTTLRTDFSPFCSIMNGTQLTY*                                        |
| SAFV-1           | TDIRFCALFALLTSLQMDLLLYLTMNGTRLTSLLLTWTTTCFIPRI-----VLWNGLIYH*              |
| TMEV DA          | MDTQMCALFAQPLTLLPDLNICSWQTVNGSQRTFFVVTWTMTSSGLRTRALNKLQWNGLYRSYAILSWNPRETP |
| TMEV GDVII       | TDTQTCALFAQPLTLLPDLNICSWQTEGSLRTEFFVVTWTMTSSGLRTRALNKLQWNGLYRSYAILSWNPREMP |
| EMCV             | LQPWNKRFLVLP*                                                              |
