# Supplementary material for: Saffold Virus, a Human Theiler's-Like Cardiovirus, Is Ubiquitous and Causes Infection Early in Life
Source: PubMed Central journal article supplement (PMC2670511; doi:10.1371/journal.ppat.1000416), 2009-05-01
Supplement: ppat.1000416.s003.pdf [file ppat.1000416.s003.pdf]

**Table S1.** Nucleotide and amino acid (in parenthesis) identity of SAFV-3(NL2007) UTRs and proteins to other Theiloviruses from which full-length sequences or polyprotein coding regions are known.

|                  | 5'UTR | Leader  | VP4      | VP2     | VP3     | VP1     | 2A      | 2B      | 2C      | 3A       | 3B       | 3C      | 3D      | 3'UTR |
|------------------|-------|---------|----------|---------|---------|---------|---------|---------|---------|----------|----------|---------|---------|-------|
| SAFV-2 UC1       | 90    | 80 (83) | 82 (100) | 72 (77) | 71 (81) | 69 (73) | 85 (98) | 89 (99) | 88 (97) | 88 (100) | 82 (95)  | 90 (96) | 89 (98) | 97    |
| SAFV-2 Can112051 |       | 78 (82) | 82 (99)  | 71 (77) | 71 (81) | 69 (73) | 85 (96) | 89 (98) | 88 (97) | 87 (99)  | 82 (95)  | 90 (96) | 88 (97) |       |
| SAFV-1           | 91    | 79 (82) | 84 (99)  | 71 (79) | 74 (85) | 64 (68) | 88 (98) | 89 (99) | 88 (97) | 87 (99)  | 88 (100) | 89 (98) | 89 (98) | 97    |
| TMEV GDVII       | 75    | 66 (68) | 70 (69)  | 66 (70) | 70 (81) | 60 (55) | 63 (63) | 66 (62) | 72 (78) | 64 (66)  | 63 (60)  | 69 (77) | 70 (77) | 88    |
| TMEV DA          | 75    | 66 (68) | 70 (69)  | 67 (71) | 68 (79) | 58 (57) | 63 (61) | 66 (63) | 71 (79) | 66 (67)  | 63 (60)  | 69 (76) | 69 (77) | 87    |
| TRV-1            | 84    | 67 (68) | 69 (73)  | 68 (73) | 70 (78) | 61 (53) | 65 (69) | 71 (74) | 77 (89) | 71 (78)  | 67 (70)  | 72 (81) | 73 (82) | 90    |
| TRV NGS910       | 84    | 66 (66) | 68 (74)  | 67 (73) | 71 (79) | 61 (53) | 66 (69) | 72 (74) | 78 (90) | 70 (78)  | 63 (70)  | 72 (81) | 73 (82) | 89    |
| VHEV             | 74    | 66 (67) | 70 (74)  | 67 (71) | 71 (77) | 62 (55) | 64 (62) | 66 (62) | 71 (78) | 64 (69)  | 65 (60)  | 70 (77) | 69 (77) | 87    |
